# Supplementary material for: FilGAP regulates tumor growth in Glioma through the regulation of mTORC1 and mTORC2
Source: Research Square preprint supplement (doi:10.21203/rs.3.rs-3219907/v1), 2023-08-11
Supplement: Supplementary file 1 [file be680617084ca09a3be890d3.xlsx]

## Sheet: antibody&reagent
Name	Company, product number, host	Dilution
Antibody
anti-DDDDK-tag	MBL, PM020, Rabbit	1:1,000
anti-Flag-tag M2	Sigma, F3165, Mouse	1:1,000
anti-HA-tag	MBL, 561, Rabbit	1:1,000
anti-HA-tag 12CA5	Roche, 11583816001, Mouse	1:1,000
anti-Myc-tag	MBL, 562, Rabbit	1:1,000
anti-phospho-AKT Ser473 D9E	Cell Signaling, 4060, Rabbit	1:2,000
anti-AKT(pan) 40D4	Cell Signaling, 2920, Mouse	1:1,000
Phospho-p70 S6 Kinase (Thr389) 108D2	Cell Signaling, 9234, Rabbit	1:1,000
p70 S6 kinase/S6K1 H-9	Santa cruz, sc-8418, Mouse	1:500
anti-beta-Actin 13E5	Cell Signaling, 4970, Rabbit	1:1,000
anti-alpha-Tubulin B-5-1-2	Sigma, T5168, mouse	1:5,000
anti-mTOR 7C10	Cell Signaling, 2983, Rabbit	1:1000
anti-Raptor	Bethyl labratories, A300-553A, Rabbit	1:1000
anti-Rictor	Bethyl labratories, A300-459A, Rabbit	1:1000
anti-Sin1 1C7.2	Merck, 05-1044, Mouse	1:1000
anti-FLNa PM6/317	Millipore,	1:1000
anti-FilGAP	Ohta et al., 2006, Rabbit	1:500
Goat anti-Mouse IgG(H+L)-HRP	BioRad, 1706516	1:5000
Goat anti-Rabbit IgG(H+L)-HRP	BioRad, 1706515	1:5000
CF800 Goat-anti-mouse IgG	Biotium, 20831, Mouse	1:10000
CF680 Goat-anti-mouse IgG	Biotium, 20065, Mouse	1:20000
CF800 Goat-anti-rabbit IgG	Biotium, 20832, Rabbit	1:10000
CF680 Goat-anti-rabbit IgG	Biotium, 20067, Rabbit	1:20000
Reagent
Protease inhibitor cocktail	Sigma, P8340
Rapamycin	LKT labs, R0161
Torin-1	Sigma, 475991
LY294002	Sigma, L9908
KOD-Plus-Neo	TOYOBO, KOD-401
ReverTra Ace® qPCR RT Master Mix	TOYOBO, FSQ-201
Penicillin-Streptomycin (5,000 U/mL)	Thermo Fisher, 15070063
DMEM	Sigma, D6429
MEM	Sigma, M4655
RPMI 1640	Gibco, 22400-105
E-MEM	Fujifilm, 051-07615
Intercept (PBS) Blocking Buffer	LI-COR, 927-70001
Lipofectamine 2000	Thermo Fisher, 11668019
Lipofectamine RNAiMAX	Thermo Fisher, 13778150
Anti-Flag M2 affinity agarose gel	Sigma, A2220

## Sheet: siRNA
name	5' to 3' sequence
siRNA
human FilGAP KD#1	AAGAUAGAGUAUGAGUCCAGGAUAA	nt 1975-1999
human FilGAP KD#2	CAGUGGUAAAUUACAACCUCCUCAA	nt 789-813
human FilGAP iso1 KD	UCUCCGUGGAGUCAUUGUUCUCCUC	nt 453-477
Raptor KD	UUUCGAAACAGACUAGCCACCAGCA	nt 1022-1046
Rictor KD	UCAUCUUUCUGACUAAUCGAAGUGC	nt 458-482
